# Supplementary material for: Specific reactivity of 4d and 5d transition metals supported over CeO2 for ammonia oxidation
Source: Royal Society of Chemistry journal article supplement (doi:10.1039/d2cy01380k), 2022-01-01
Supplement: d2cy01380k1.pdf [file d2cy01380k1.pdf]

## Supplementary Materials for

### ***Specific Reactivity of 4d and 5d Transition Metals Supported over CeO<sub>2</sub> for Ammonia Oxidation***

Yitong Guo <sup>a</sup>, Lei Ma <sup>\*a</sup>, Zhisong Liu <sup>a</sup>, Zihao Li <sup>a</sup>, Huazhen Chang <sup>b</sup>, Xiaoran Zhao, <sup>c</sup> Naiqiang Yan <sup>a</sup>

<sup>a</sup> *School of Environmental Science and Engineering, Shanghai Jiao Tong University, Shanghai 200240, China*

<sup>b</sup> *School of Environment and Natural Resources, Renmin University of China, Beijing 100872, China*

<sup>c</sup> *Shanghai Key Laboratory of Advanced High-temperature Materials and Precision Forming, State Key Laboratory of Metal Matrix Composites, School of Materials Science and Engineering, Shanghai Jiao Tong University, Shanghai 200240, China.*

\*Correspondence to [leima8@sjtu.edu.cn](mailto:leima8@sjtu.edu.cn)

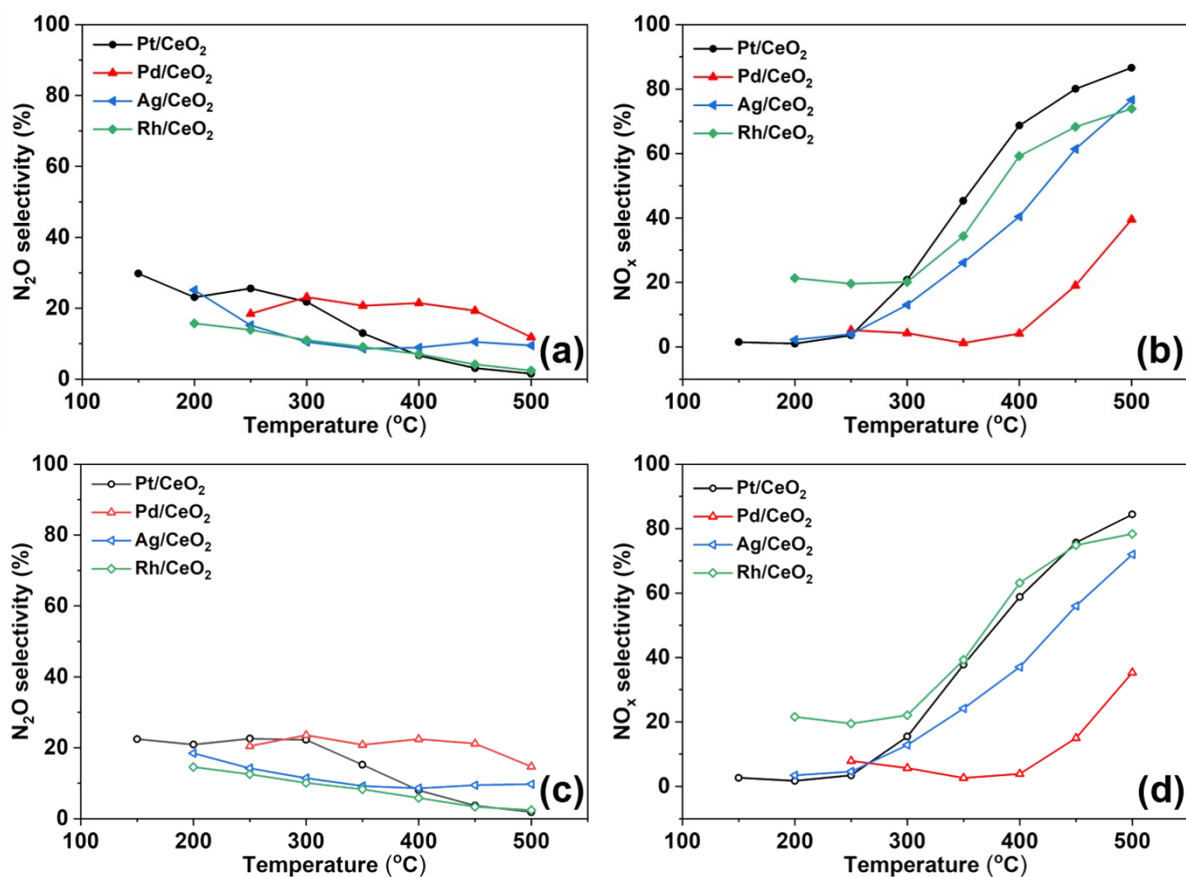

Figure S1. The N<sub>2</sub>O selectivity (a, c) and NO<sub>x</sub> selectivity (b, d) during selective catalytic of oxidation over prepared catalysts. Reaction conditions: 500 ppm NH<sub>3</sub>, 12% O<sub>2</sub>, balance N<sub>2</sub>, and WHSV = 240,000 mL g<sup>-1</sup> h<sup>-1</sup> (a, b) or 400,000 mL g<sup>-1</sup> h<sup>-1</sup> (c, d).

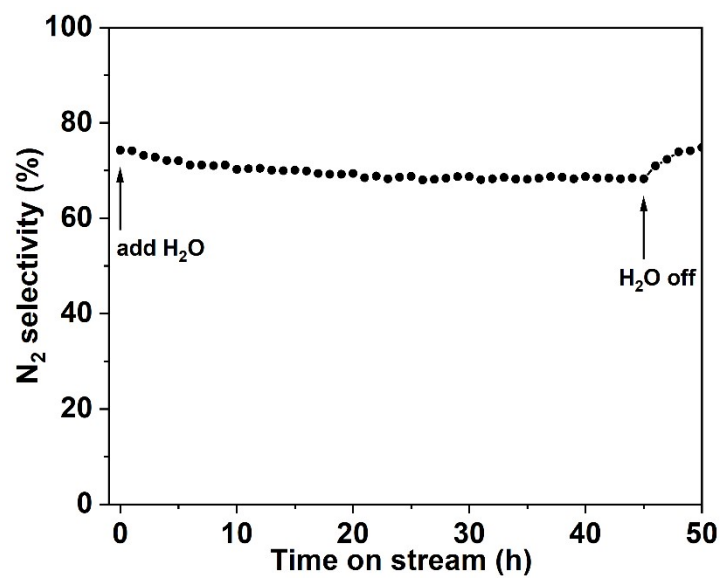

Figure S2. The N<sub>2</sub> selectivity during stability test on Pt/CeO<sub>2</sub> with H<sub>2</sub>O at 250 °C. Reaction conditions: 500 ppm NH<sub>3</sub>, 12% O<sub>2</sub>, 5% H<sub>2</sub>O balance N<sub>2</sub>, and WHSV = 240, 000 mL g<sup>-1</sup> h<sup>-1</sup>.

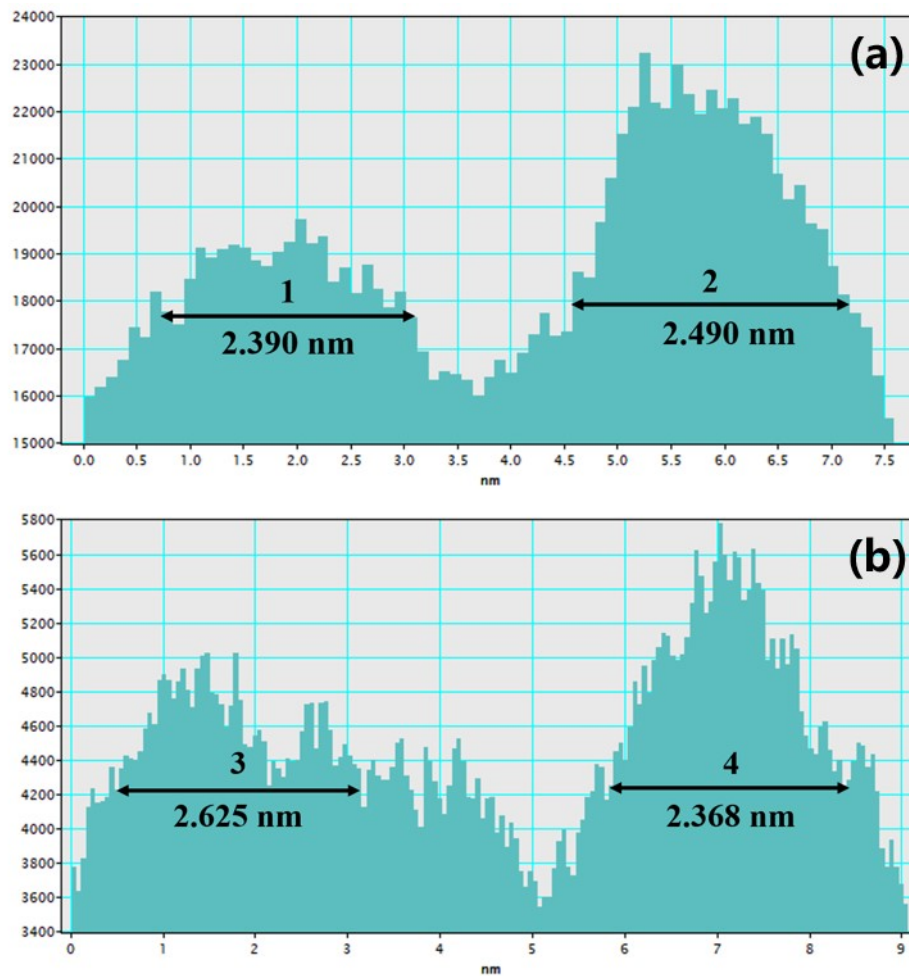

Figure S3. (a) Intensity profile of Pt clusters over Pt/CeO<sub>2</sub> in positions 1 and 2. (b) Intensity profile of Pt clusters over Pt/CeO<sub>2</sub> in positions 3 and 4.

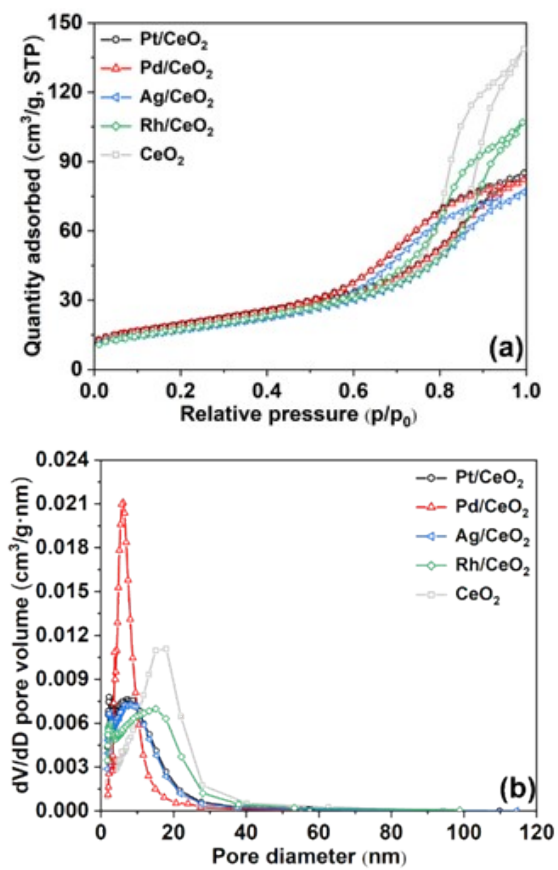

Figure S4. N<sub>2</sub> adsorption-desorption isotherms (a) and pore size distributions (b) of prepared catalysts.

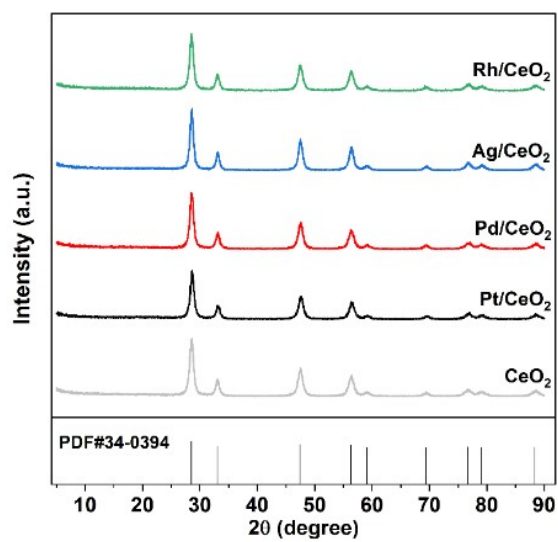

Figure S5. XRD patterns of prepared catalysts.

Table S1. Comparison of catalytic oxidation performance of different NH<sub>3</sub>-SCO catalysts in the literatures.

| Catalysts                                        | NH <sub>3</sub> conversion (%) | N <sub>2</sub> selectivity (%) | Reaction conditions                                                                                                           | Reference  |
|--------------------------------------------------|--------------------------------|--------------------------------|-------------------------------------------------------------------------------------------------------------------------------|------------|
| Al <sub>2</sub> O <sub>3</sub> -Pt               | 100 (300°C)                    | 56 (300°C)                     | 5000 ppm NH <sub>3</sub> , 12% O <sub>2</sub> , balance He,<br>WHSV = 24, 000 mL g <sup>-1</sup> h <sup>-1</sup>              | 1          |
| TiO <sub>2</sub> -Cu-Rh                          | 100 (400°C)                    | 69 (400°C)                     | 5000 ppm NH <sub>3</sub> , 12% O <sub>2</sub> , balance He,<br>WHSV = 24, 000 mL g <sup>-1</sup> h <sup>-1</sup>              | 1          |
| ZrO <sub>2</sub> -Cu-Pt                          | 100 (325°C)                    | 85 (325°C)                     | 5000 ppm NH <sub>3</sub> , 12% O <sub>2</sub> , balance He,<br>WHSV = 24, 000 mL g <sup>-1</sup> h <sup>-1</sup>              | 1          |
| Cu-Mg-Al-600-Pt                                  | 100 (366°C)                    | 86 (366°C)                     | 5000 ppm NH <sub>3</sub> , 2.5% O <sub>2</sub> , balance He,<br>WHSV = 48, 000 mL g <sup>-1</sup> h <sup>-1</sup>             | 2          |
| Fe <sub>2</sub> O <sub>3</sub> -TiO <sub>2</sub> | 65 (350°C)                     | 78 (350°C)                     | 1000 ppm NH <sub>3</sub> , 2% O <sub>2</sub> , balance He,<br>WHSV = 150, 000 mL g <sup>-1</sup> h <sup>-1</sup>              | 3          |
| Mn-SiO <sub>2</sub>                              | 100 (335°C)                    | 30 (335°C)                     | 2000 ppm NH <sub>3</sub> , 2.5% O <sub>2</sub> , balance He,<br>GHSV = 24, 000 h <sup>-1</sup>                                | 4          |
| Ir/Ce-Zr                                         | 99 (400°C)                     | 60 (400°C)                     | 110 ppm NH <sub>3</sub> , 4% O <sub>2</sub> , balance N <sub>2</sub> ,<br>WHSV = 500, 000 mL g <sup>-1</sup> h <sup>-1</sup>  | 5          |
| Ag/SiO <sub>2</sub>                              | 100 (300°C)                    | 62 (300°C)                     | 1000 ppm NH <sub>3</sub> , 10% O <sub>2</sub> , balance He,<br>WHSV = 30, 000 mL g <sup>-1</sup> h <sup>-1</sup>              | 6          |
| V-Ce-Ti                                          | 96 (300°C)                     | 90 (300°C)                     | 200 ppm NH <sub>3</sub> , 8% O <sub>2</sub> , balance N <sub>2</sub> ,<br>GHSV = 60, 000 h <sup>-1</sup>                      | 7          |
| Cu-Ag/Al <sub>2</sub> O <sub>3</sub>             | 100 (375°C)                    | 94 (375°C)                     | 5000 ppm NH <sub>3</sub> , 2.5% O <sub>2</sub> , balance Ar,<br>WHSV = 24, 000 mL g <sup>-1</sup> h <sup>-1</sup>             | 8          |
| Pt/CeO <sub>2</sub>                              | 90 (230°C)                     | 76 (230°C)                     | 500 ppm NH <sub>3</sub> , 12% O <sub>2</sub> , balance N <sub>2</sub> ,<br>WHSV = 240, 000 mL g <sup>-1</sup> h <sup>-1</sup> | This study |

Table S2. Quantitative results of hydrogen consumption and peak area in H<sub>2</sub>-TPR profiles.

| Samples             | Gaussian sub-peaks  |             |           | Total hydrogen consumption (mmol/g <sub>cat</sub> ) |                          |
|---------------------|---------------------|-------------|-----------|-----------------------------------------------------|--------------------------|
|                     | Peak No.            | Center (°C) | Peak Area | Actual <sup>a</sup>                                 | Theoretical <sup>b</sup> |
| CeO <sub>2</sub>    | III                 | 399         | 112178.2  | 0.288                                               | 2.905 <sup>(1)</sup>     |
|                     |                     | 471         | 178252.8  |                                                     |                          |
|                     |                     | 525         | 200628.9  |                                                     |                          |
|                     | IV                  | 608         | 16549.4   | 0.447                                               |                          |
|                     |                     | 798         | 602676.1  |                                                     |                          |
|                     |                     | 896         | 143364.9  |                                                     |                          |
| Pt/CeO <sub>2</sub> | I                   | 84          | 16290.3   | 0.362                                               | 0.031 <sup>(2)</sup>     |
|                     |                     | 119         | 63503.1   |                                                     |                          |
|                     |                     | 178         | 487953.7  |                                                     |                          |
|                     |                     | 229         | 151577.6  |                                                     |                          |
|                     | III                 | 364         | 145509.7  | 0.183                                               | 2.888 <sup>(1)</sup>     |
|                     |                     | 427         | 217428.1  |                                                     |                          |
|                     | IV                  | 531         | 81332.1   | 0.492                                               |                          |
|                     |                     | 680         | 146349.1  |                                                     |                          |
|                     |                     | 803         | 750105    |                                                     |                          |
|                     | Pd/CeO <sub>2</sub> | I           | 62        | -6307.1                                             | 0.079                    |
| 129                 |                     |             | 84946.0   |                                                     |                          |
| II                  |                     | 180         | 7669.8    | 0.339                                               | 2.883 <sup>(1)</sup>     |
|                     |                     | 221         | 58057.4   |                                                     |                          |
|                     |                     | 350         | 246854.4  |                                                     |                          |
| III                 |                     | 428         | 400863.7  | 0.686                                               |                          |
|                     |                     | 609         | 138333.0  |                                                     |                          |
| IV                  |                     | 823         | 1171487   |                                                     |                          |
|                     |                     |             |           |                                                     |                          |
|                     |                     |             |           |                                                     |                          |
| Ag/CeO <sub>2</sub> | I                   | 100         | 147009.3  | 0.215                                               | -(4)                     |
|                     |                     | 144         | 170951.1  |                                                     |                          |
|                     |                     | 210         | 64320.1   |                                                     |                          |
|                     |                     | 248         | 21778.5   |                                                     |                          |
|                     | III                 | 342         | 6778.2    | 0.004                                               | 2.883 <sup>(1)</sup>     |
|                     |                     | 484         | 25415.8   |                                                     |                          |
|                     | IV                  | 580         | 40269.6   | 0.477                                               |                          |
|                     |                     | 809         | 831874.1  |                                                     |                          |
|                     |                     |             |           |                                                     |                          |
| Rh/CeO <sub>2</sub> | I                   | 77          | 62714.6   | 0.160                                               | 0.285 <sup>(5)</sup>     |
|                     |                     | 99          | 39494.1   |                                                     |                          |
|                     |                     | 149         | 97794.1   |                                                     |                          |
|                     |                     | 224         | 99959.9   |                                                     |                          |
|                     | III                 | 304         | 81946.1   | 0.063                                               | 2.876 <sup>(1)</sup>     |
|                     |                     | 408         | 35560.8   |                                                     |                          |
|                     | IV                  | 635         | 41599.4   | 0.421                                               |                          |
|                     |                     | 788         | 747589.1  |                                                     |                          |



<sup>a</sup> The actual hydrogen consumption was calculated based on the peak area of the Gaussian sub-peaks.

<sup>b</sup> The theoretical hydrogen consumption of M/CeO<sub>2</sub> was calculated based on the ICP-OES results. The relevant chemical equations are as follows:

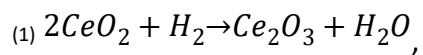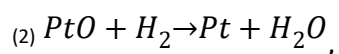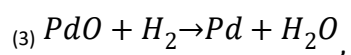

(4) Ag<sup>0</sup> was not reduced by H<sub>2</sub>,

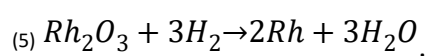

## Reference

1. M. Jabłońska, *Catal. Commun.*, 2015, **70**, 66-71.
2. L. Chmielarz, M. Jabłońska, A. Strumiński, Z. Piwowarska, A. Węgrzyn, S. Witkowski and M. Michalik, *Appl. Catal. B: Environ.*, 2013, **130**, 152-162.
3. R. Long and R. Yang, *J. Catal.*, 2002, **207**, 158-165.
4. P. Fabrizioli, T. Buergi and A. Baiker, *J. Catal.*, 2002, **207**, 88-100.
5. W. Chen, Z. Qu, W. Huang, X. Hu and N. Yan, *Fuel*, 2016, **166**, 179-187.
6. L. Gang, B. Anderson, J. Van Grondelle and R. Van Santen, *Appl. Catal. B: Environ.*, 2003, **40**, 101-110.
7. S. M. Lee and S. C. Hong, *Appl. Catal. B: Environ.*, 2015, **163**, 30-39.
8. M. Jabłońska, A. M. Beale, M. Nocuń and R. Palkovits, *Appl. Catal. B: Environ.*, 2018, **232**, 275-287.
